# Supplementary material
Source: Elsevier journal article supplement (https://rcastoragev2.blob.core.windows.net/24212376e561e67516e5b64e67d1c3af/mmc1.pdf)
Supplement: mmc1 [file mmc1.pdf]

**Supplemental information**

**YAP1 is a key regulator of EWS::FLI1-dependent  
malignant transformation upon IGF-1-mediated  
reprogramming of bone mesenchymal stem cells**

**Rahil Noorizadeh, Barbara Sax, Tahereh Javaheri, Branka Radic-Sarikas, Valerie Fock, Veveeyan Suresh, Maximilian Kauer, Aleksandr Bykov, Danijela Kurija, Michaela Schleder, Lukas Kenner, Gerhard Weber, Wolfgang Mikulits, Florian Halbritter, Richard Moriggl, and Heinrich Kovar**

**Figure S1**

**A**

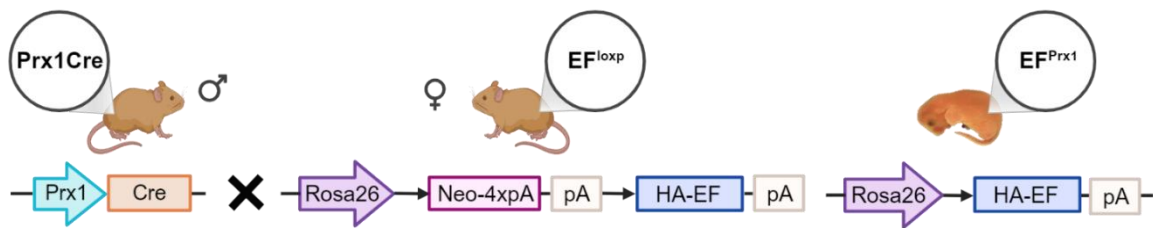

**B**

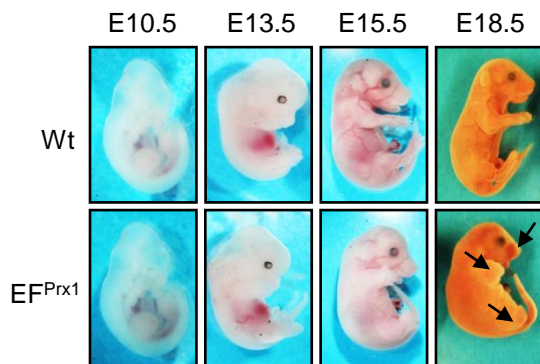

**C**

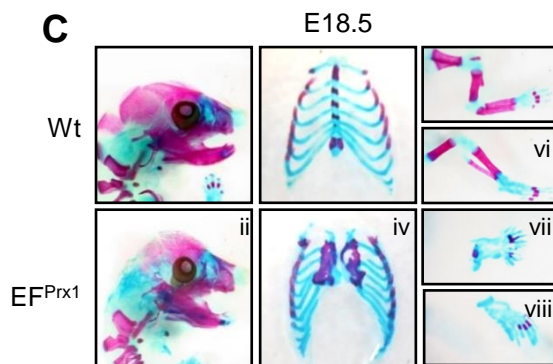

**D**

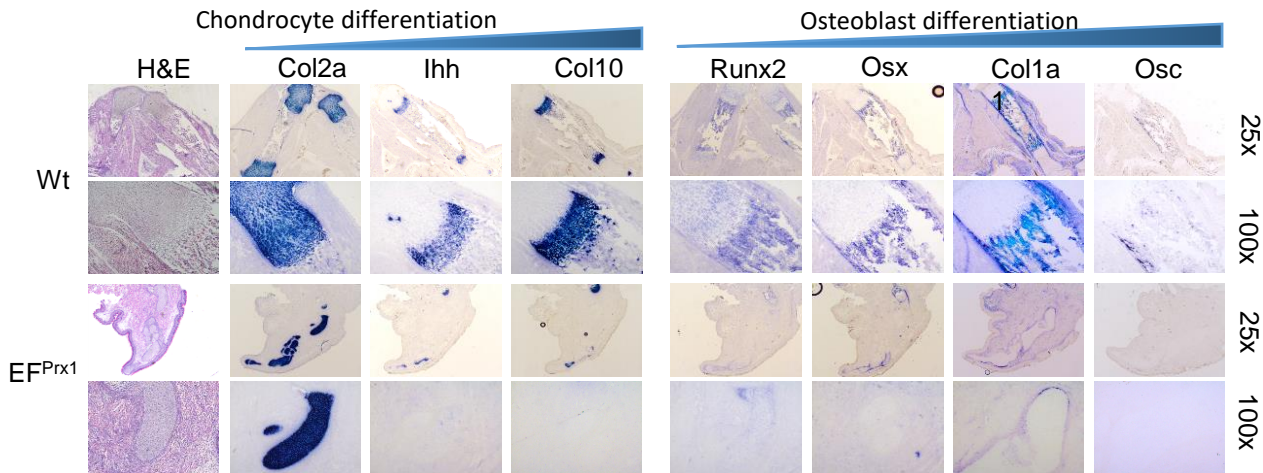

**E**

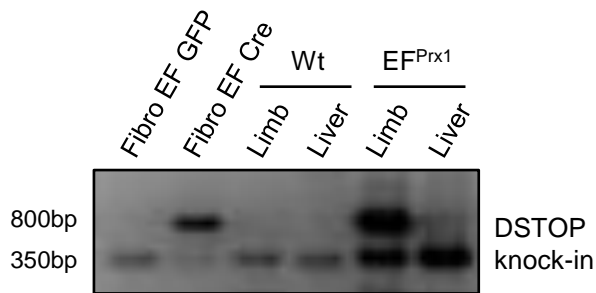

**F**

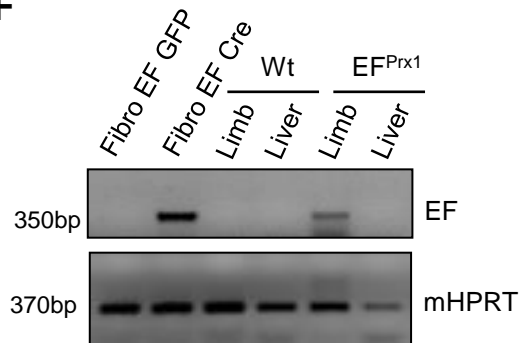

**G**

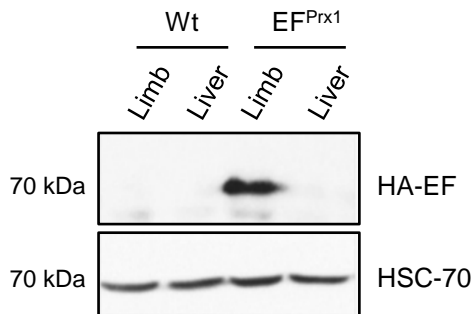

**Figure S1.** Early EF expression in MSCLC during embryogenesis causes endochondral *bone formation* arrest.

**(A)** Schematic drawing of EF<sup>Prx1</sup> mice generation by crossing Prx1-Cre mice with Rosa26 loxP-STOP-loxP-HA-EF (EF<sup>loxP</sup>) mice. Black arrows: loxP sites. Hemagglutinin tag: HA, EWS::FLI1: EF. **(B)** EF<sup>Prx1</sup> mouse embryos exhibit multiple abnormalities of the limbs and the cranium (blue dashed arrows). **(C)** Skeletal preparations and analysis with Alcian Blue/Alizarin Red staining of E18.5 Wt and EF<sup>Prx1</sup> embryos. Blue staining marks cartilage elements, whereas pink color indicates calcified bone. EF<sup>Prx1</sup> embryos had defects in the development of craniofacial (i,ii), the sternum (iii, iv), forelimbs (v, vii), and hindlimbs (vi,viii). **(D)** Hematoxylin and Eosin (H&E) stains of the E18.5 limb structures (left) revealed a well-organized bone tissue context with distinct cell layers till the epidermis, while the limb structure of EF<sup>Prx1</sup> embryos appeared completely disorganized. Endochondral bone formation is tightly linked to chondrocyte differentiation. Thus, we labelled the cartilage elements of the limb anlage of Wt and EF<sup>Prx1</sup> embryos with different markers by non-radioactive *in situ* hybridisation to map distinct differentiation zones. From left to right, the markers are displayed according to their temporal expression sequence during bone maturation as indicated on top of the figure. In the Wt mouse, the resting zones on top and bottom of longitudinal bone development are marked by expression of *Col2a1* and *Indian hedgehog (Ihh)* specific for the pre-hypertrophic chondrocyte stage, and *Col10a1* marking hypertrophic chondrocyte zones. In contrast to the wt embryos, the limb anlage of EF<sup>Prx1</sup> mutant mice lack an organized longitudinal bone structure with loss of expression of all osteoblast markers. While there was a clear labelling of different endochondral bone formation zones in wt limbs, we saw mis localized staining signals in EF<sup>Prx1</sup> embryo limbs, that only display *Col2a1* expression and patchy *Ihh in situ* hybridization signals in some small elements, consistent with early chondrocytic differentiation arrest in bone development. Results are displayed in two magnifications (25x and 100x). **(E)** Analysis of genomic DNA of wild type (Wt) and EF<sup>Prx1</sup> mice (E17.5) for deletion of STOP-cassette (DSTOP) with a PCR strategy. **(F)** Detection of EF expression from reverse transcribed cDNA with EF-specific primers. mHPRT was used as an internal control. Fibro EF GFP or Cre: fibroblasts isolated from EF mice lentivirally transduced with an expression construct encoding GFP or Cre recombinase served as negative and positive controls. **(G)** The presence of EF protein in EF<sup>Prx1</sup> limbs was verified by immunoblot analysis using an antibody specific for the HA-tag. HSC-70 was used as a loading control.

**Figure S2**

**A**

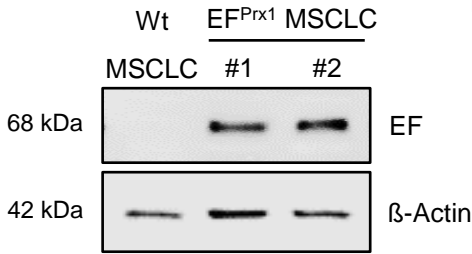

**B**

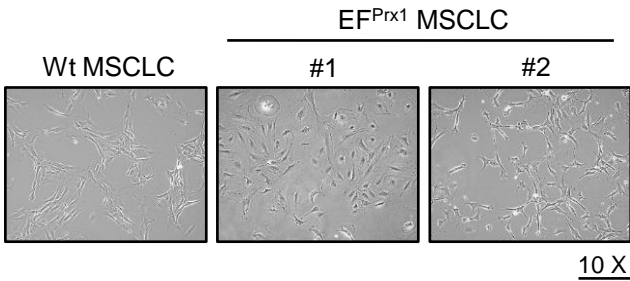

**C**

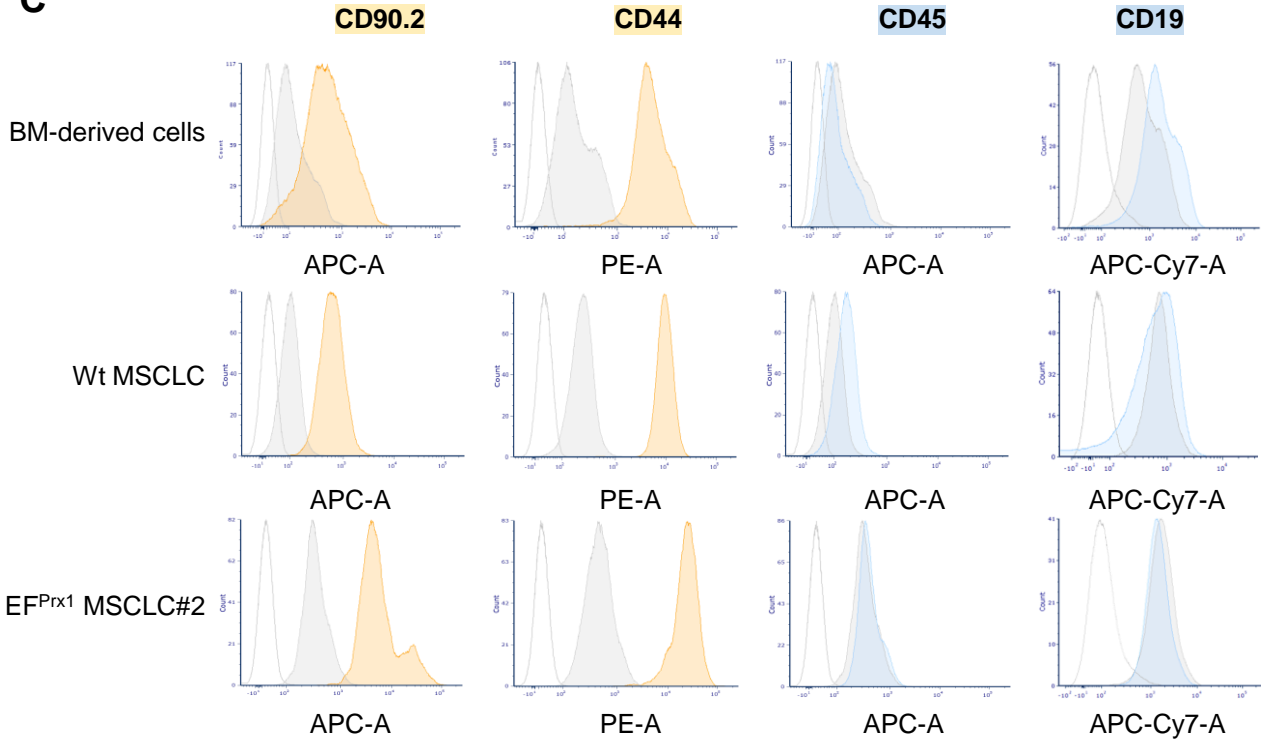

**D**

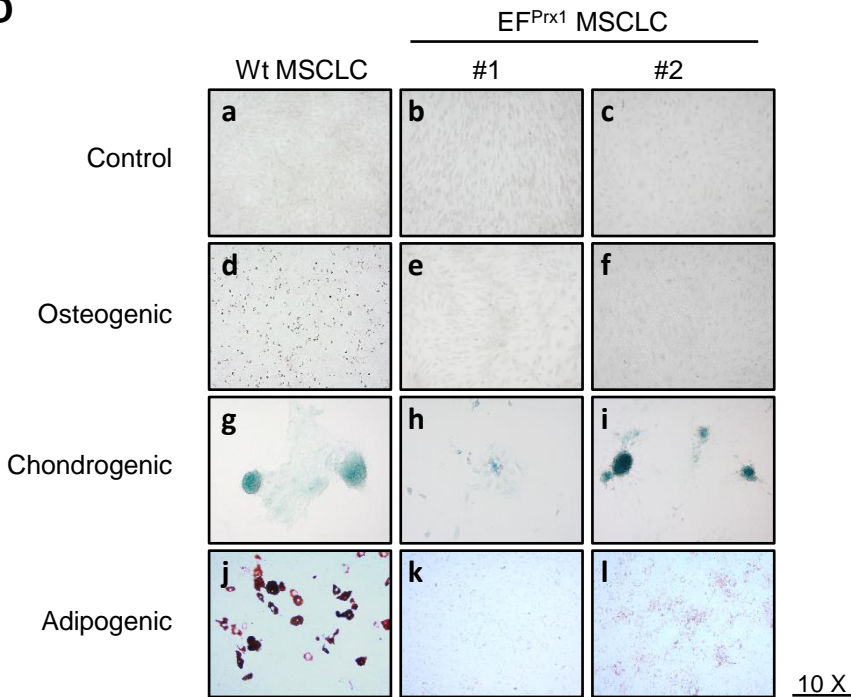

**Figure S2.** Differentiation potential of EF expressing bone derived MSCLC. EF<sup>Prx1</sup> MSCLCs stably expressed EF protein and were morphologically and immunophenotypically similar to Wt MSCLC.

**(A)** Presence of EF protein in MSCLC isolated from EF<sup>Prx1</sup> limb bud (EF<sup>Prx1</sup> MSCLC) was verified with Western blot analysis using an antibody against the FLI1 C-terminus. MSCLC from the limb of Prx1Cre mice (Wt MSCLCs) served as a negative control.  $\beta$ -Actin was used as a loading control. **(B)** Morphology of Wt and EF<sup>Prx1</sup> MSCLC#1 and #2 (magnification 10 $\times$ ). **(C)** Flow cytometric characterization of Wt MSCLC and EF<sup>Prx1</sup> MSCLC revealing positivity for mesenchymal markers CD90 and CD44 (orange-filled peaks) and negativity for hematopoietic markers CD45 and CD19 (blue-filled peaks). Grey-filled peaks show staining with isotype controls; empty peaks show negative controls of unstained cells. **(D)** In vitro differentiation potential of MSCLC and EF<sup>Prx1</sup> MSCLC#1 and #2 upon 21 days incubation with differentiation inducing cocktails for osteogenic, chondrogenic, and adipogenic differentiation. (a–f) Alizarin red staining, (g–i) Alcian blue staining, and (j–l) Oil Red O staining was used to assess osteogenic, chondrogenic, and adipogenic differentiation, respectively (magnification 10 $\times$ ).

### Figure S3

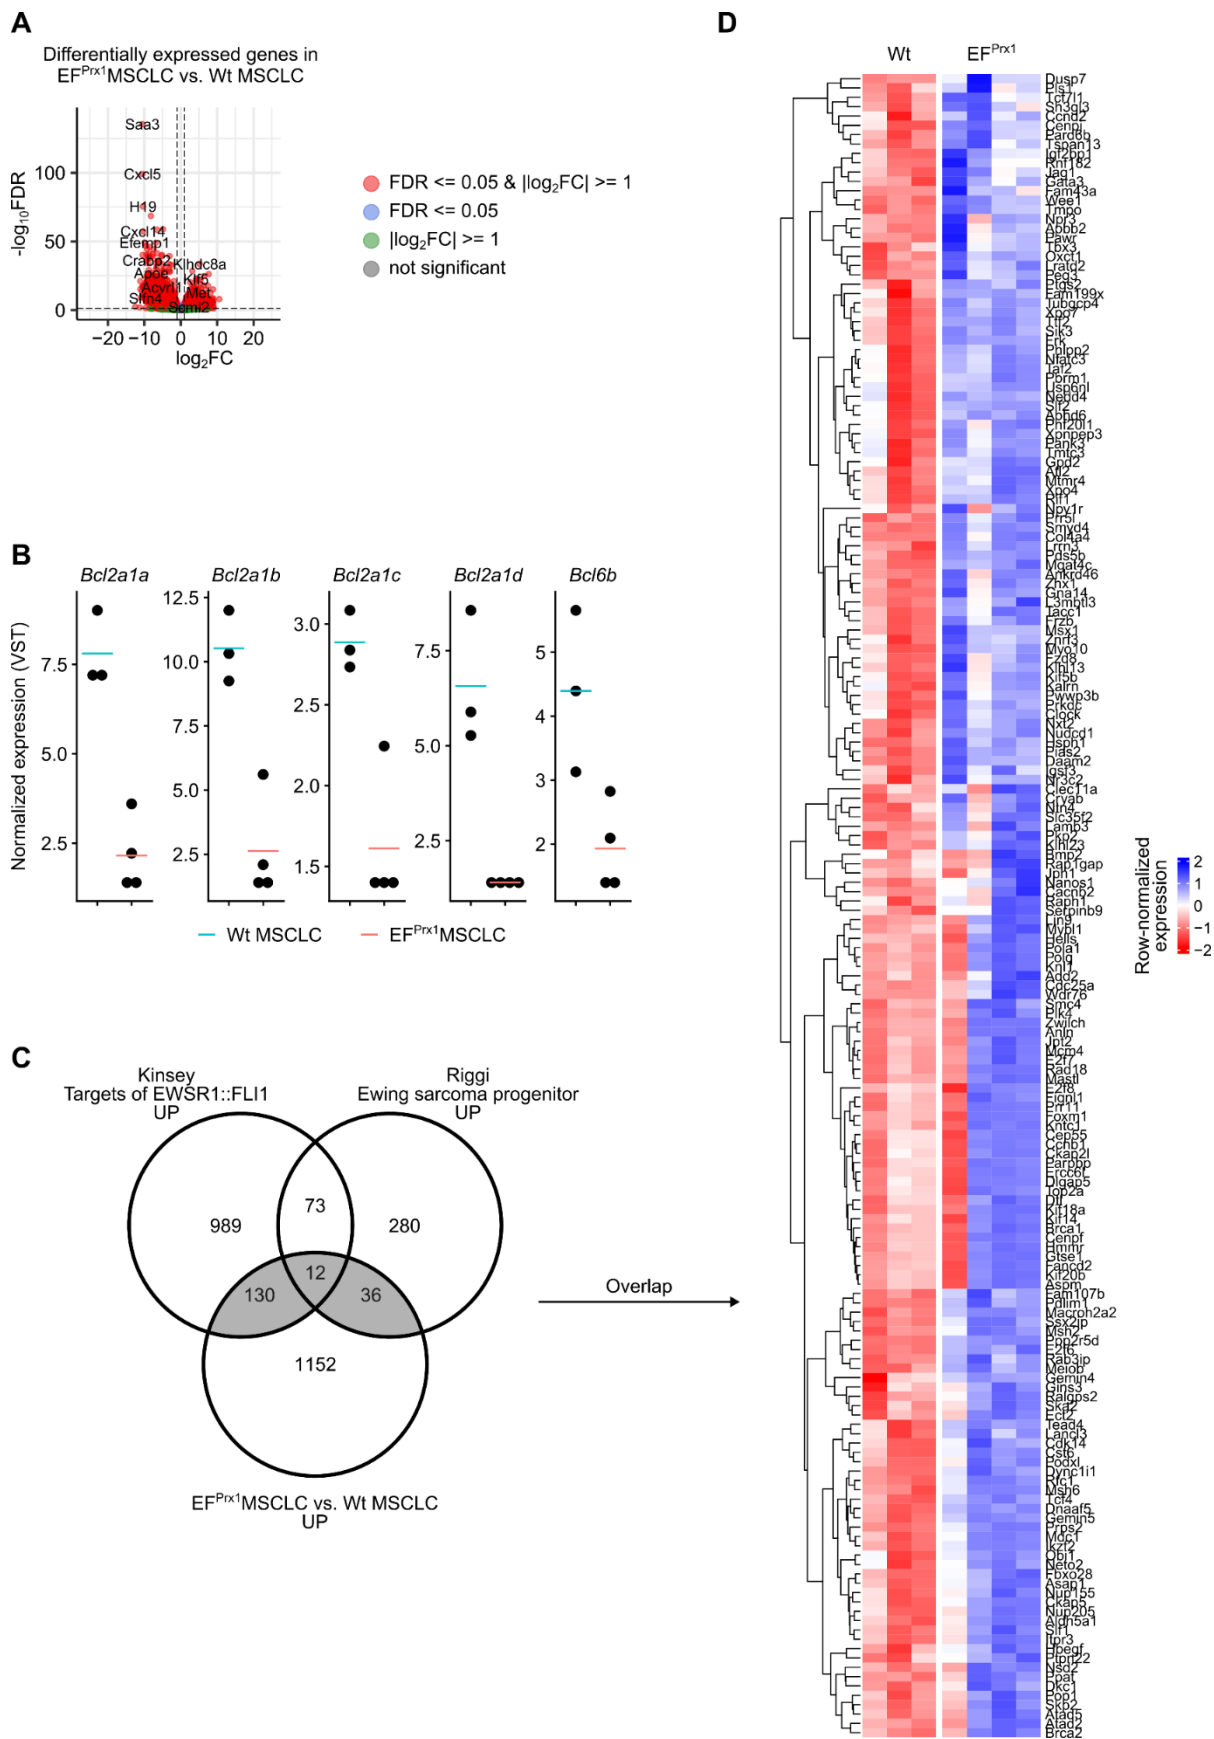

**Figure S3.** Differentially expressed genes between EF<sup>Prx1</sup> MSCLC and Wt MSCLC.

**(A)** Volcano plot of differentially expressed genes between EF<sup>Prx1</sup> MSCLC and Wt MSCLC identified by DESeq2. The X-axis indicates the logarithms of the fold changes of individual genes. The Y-axis indicates the negative logarithm of their P-value to base 10 (DESeq2 [S1];  $P_{adj} < 0.05$ ,  $|\log_2FC| > \log_2(2)$ ;  $n(\text{EF}^{\text{Prx1}}) = 4$ ,  $n(\text{Wt}) = 3$ ). See **Table S2**. **(B)** Normalized RNA-seq counts of transcripts for Bcl2a family members in EF<sup>Prx1</sup> MSCLC vs. Wt MSCLC groups. **(C)** Venn diagrams showing the overlap between up-regulated genes in EF<sup>Prx1</sup> MSCLC vs Wt MSCLC and genes modulated by EF upon knockdown in EwS cell lines TC71 and EWS502 [S2], and genes upregulated in human mesenchymal stem cells engineered to express ectopic EF [S3]. Overlaps between human and mouse gene signatures were determined by matching gene symbols. See Table S3 for results of overlap enrichment analyses. **(D)** Heatmap showing z-score of DESeq2 normalized counts for candidate EF target in the overlap of gene signatures shown in **C**.

Figure S4

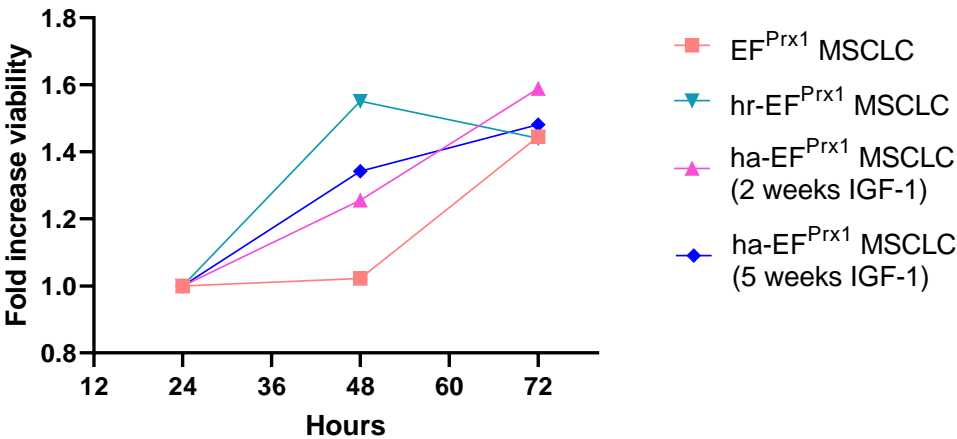

**Figure S4.** Increased viability of EF<sup>Prx1</sup> MSCLC upon IGF-1 activation and reprogramming.

Cell proliferation differences between parental and hormone activated/reprogrammed cells were assessed using the CellTiter-Glo luminescent cell viability assay. Graph showing fold change of luminescence values, with background subtracted and normalized to the 24-hour time point to account for seeding differences. Each point represents the mean from three technical replicates.



**Figure S5****A**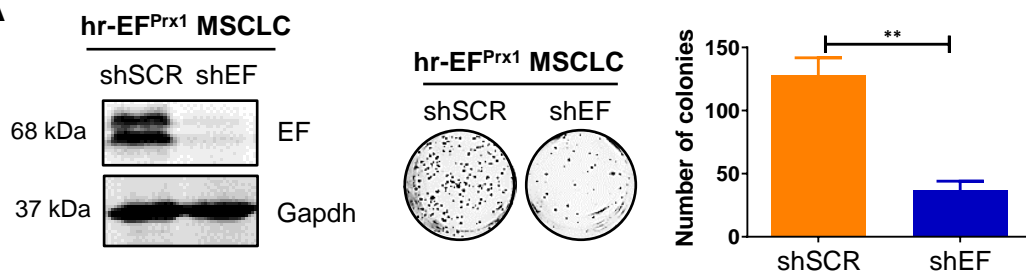**B**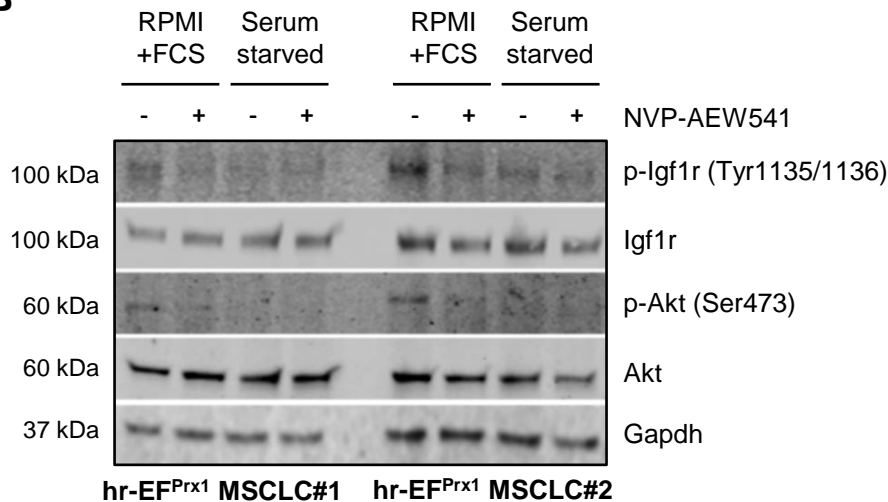**C****2D Adherent (72h)**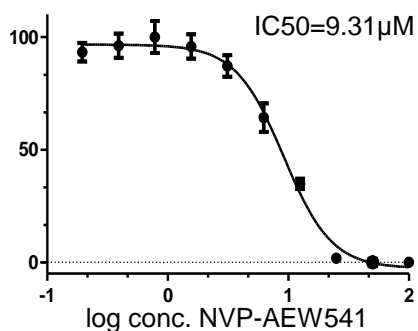**3D Spheroid (72h)**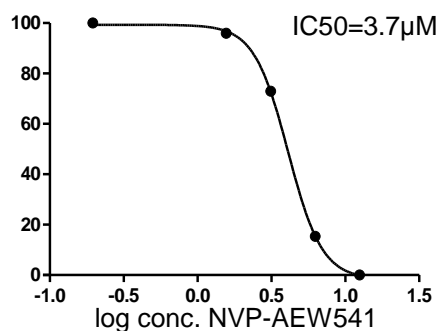**D****hr-EF<sup>Prx1</sup> MSCLC#1**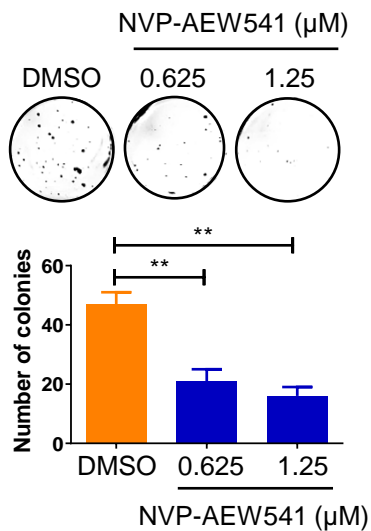**hr-EF<sup>Prx1</sup> MSCLC#2**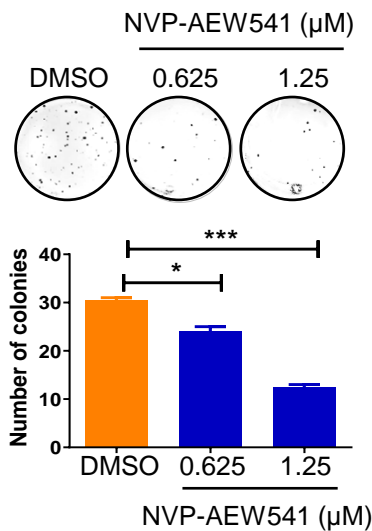

**Figure S5.** Sustained hr-EF<sup>Prx1</sup> MSCLC growth depends on EF and paracrine IGF-1 expression.

**(A)** Dependence of hr-EF<sup>Prx1</sup> MSCLC on continuous EF expression. Left: Western blot analysis of EF knockdown efficacy in hr-EF<sup>Prx1</sup> cells using EF specific shRNA (sh-EF). Scrambled shRNA was used as a non-targeting control (sh-scr). Middle: representative images of soft agar colony assay for cells transduced with the indicated shRNAs. Right: Quantification of soft agar colonies. Statistics were calculated by two-sided, unpaired Student's t-test. **(B)** IGF-1R and Akt phosphorylation status of hr-EF<sup>Prx1</sup> MSCLC propagated in growth medium supplemented with 10%FCS or serum-starved for 5 hours, followed by treatment with the IGF-1R inhibitor NVP-AEW541 for 2 hours at 1 $\mu$ M (compared to non-treated control). **(C)** Determination of IC50 values for NVP-AEW541 on hr-EF<sup>Prx1</sup> MSCLCs in both 2D and 3D (spheroid) formats. **(D)** Representative pictures and quantification of soft agar colony formation of hr-EF<sup>Prx1</sup> cells after 12 days incubation in absence (DMSO) or presence of NVP-AEW541 with inhibitor replenishment every 3 days. Colonies > 0.5 mm were counted using ImageJ software. Data are expressed as mean +/- SD. from three independent experiments, two-way Anova was used to determine statistical significance (\*P<0.05, \*\*P<0.01).

Figure S6

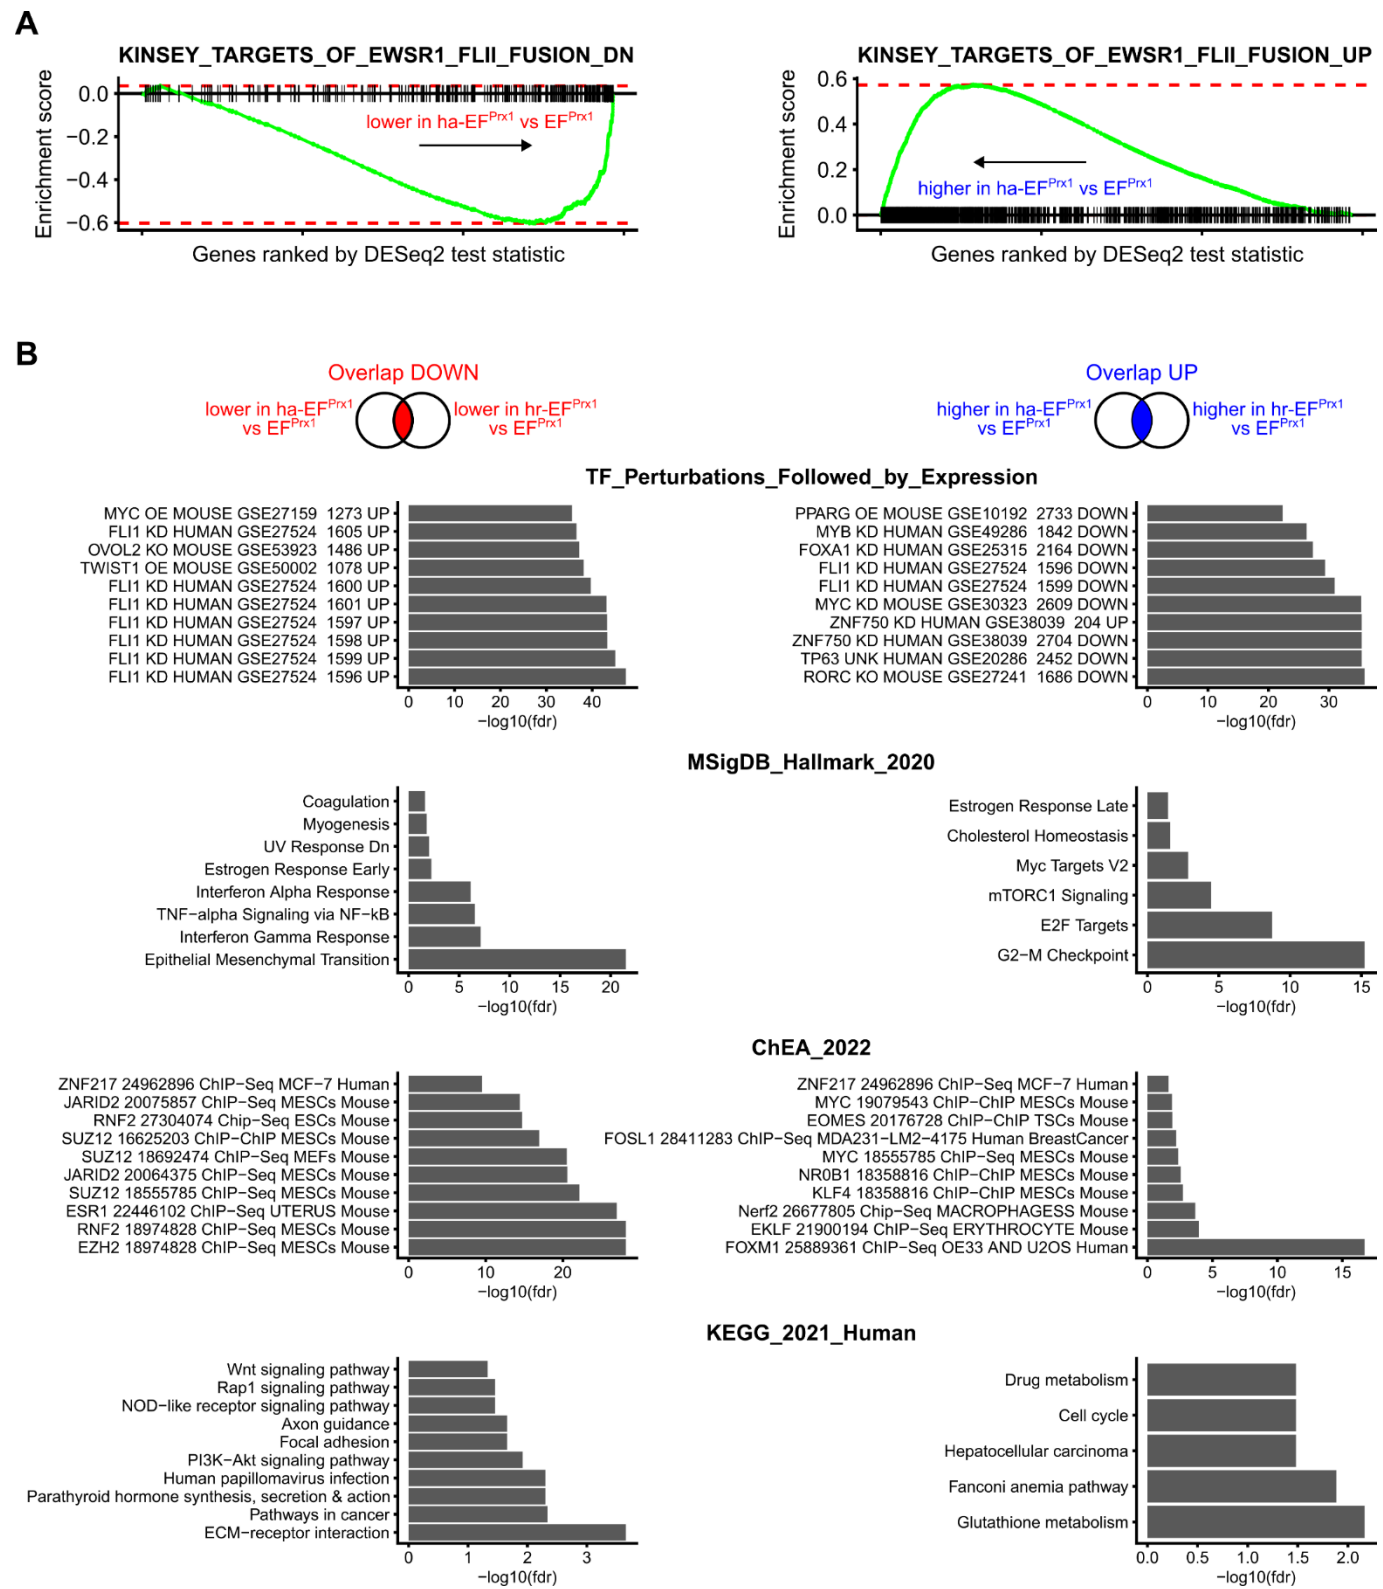

**Figure S6.** IGF-1 activation and reprogramming enforces an EWS::FLI1 transcriptional signature.

**(A)** Fast gene set enrichment analysis (fgSEA [S4]) of genes down/up-regulated in ha-EF<sup>Prx1</sup> MSCLCs versus genes down- and up-regulated by the EWS::FLI1 fusion [S2]. Genes were pre-ranked by the DESeq2 test statistic for the comparison of ha-EF<sup>Prx1</sup> MSCLC vs. EF<sup>Prx1</sup> MSCLCs. **(B)** Plots showing functional gene annotations overrepresented among down-regulated (left) and up-regulated (right) genes in ha-/hr--EF<sup>Prx1</sup> MSCLCs (overlaps from **Fig. 4B**). Each plot panel lists the top 10 terms (ranked by number of overlapping genes) and each bar shows the negative logarithm of the FDR-corrected P-value. Only significant enrichments are shown ( $P_{adj} \leq 0.05$ ). Enrichment was calculated using hyperR [S5]. See Table S8.

Figure S7

A

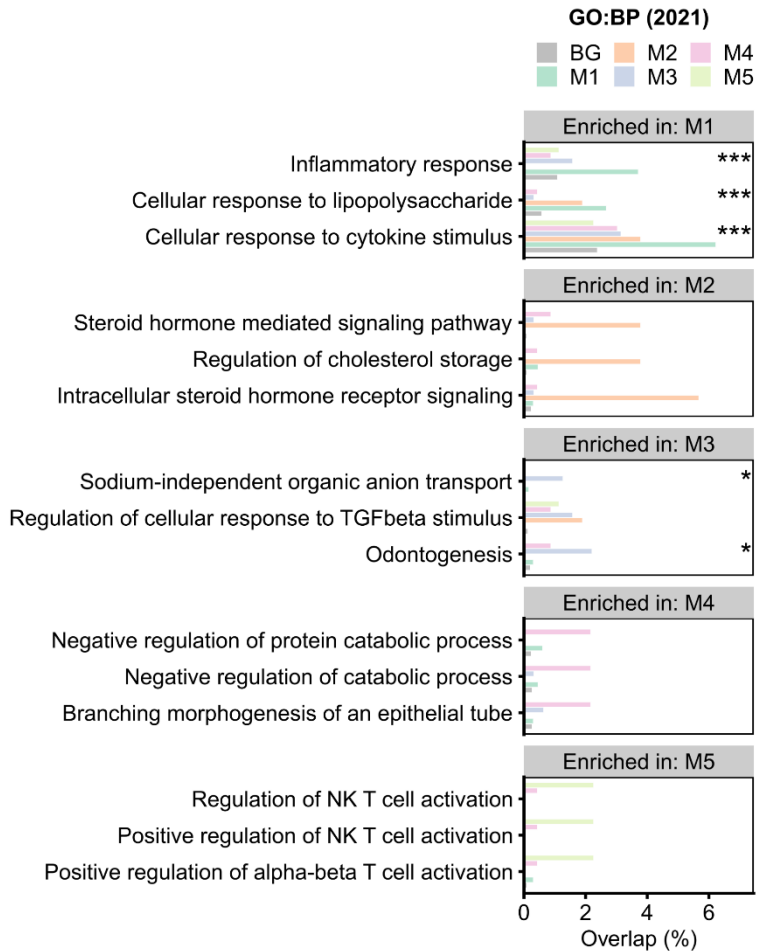

B

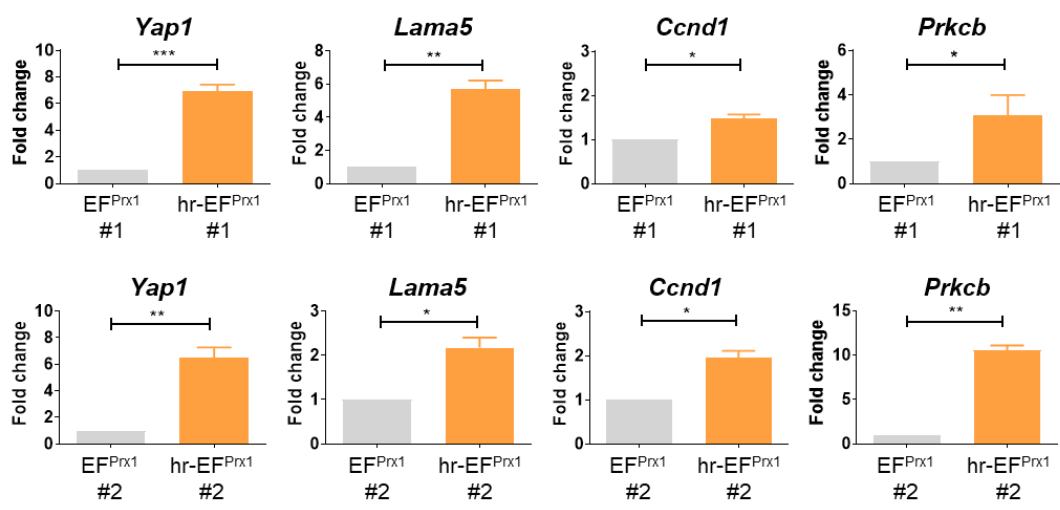

C

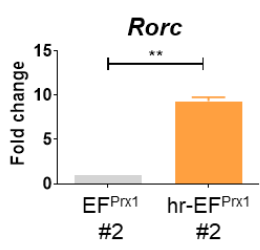

**Figure S7.** Characterization of chromatin cluster module M2.

**(A)** Plots showing gene ontology (biological process) terms overrepresented for genes associated with peaks (nearest gene) belonging to each of the five chromatin accessibility clusters displayed in **Figure 5A**. Each plot panel lists the top 3 terms per module, and each bar indicates the percentage of peaks with at least one match to the given term. Enrichment was calculated using hyperR [S5]. \*,  $P_{adj} < 0.05$ ; \*\*,  $P_{adj} \leq 0.01$ ; \*\*\*,  $P_{adj} \leq 0.005$ . See **Table S9**. **(B)** Gene expression changes of genes linked to chromatin cluster module M2. Quantitative analysis by RT-qPCR of relative mRNA expression levels of (from left to right) Yap1, Lama5, Prkcb, and Ccnd1 in hr-EF<sup>Prx1</sup> MSCLC versus EF<sup>Prx1</sup> MSCLC. Statistics were calculated by one-sided, paired Student's t-test. Data is presented as mean  $\pm$  SE (n = 3), \*\*\*P<0.001 \*\*P<0.005. \*P<0.01. **(C)** Quantitative analysis by measuring the relative mRNA expression levels of RorC for parental and hr-EF<sup>Prx1</sup> MSCLC#1 and #2. Statistics were calculated by one-sided, paired Student's t-test. Data is presented as mean  $\pm$  SE (n = 3), \*\*P<0.005.

**Figure S8**

**A**

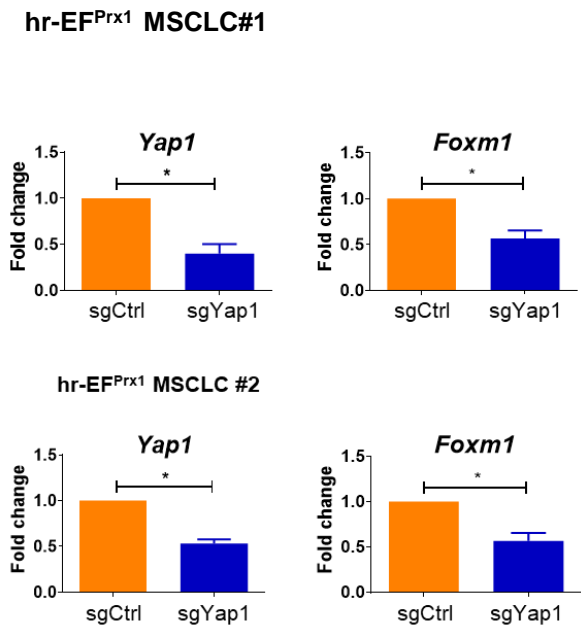

**B**

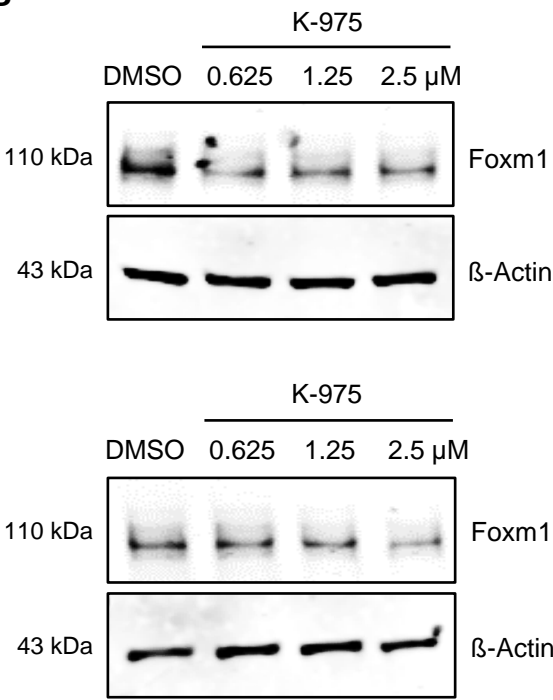

**Figure S8** Yap1 knockdown results in diminished FoxM1 expression.

(A) Quantitative analysis of Yap1 expression by RT-qPCR upon sgRNA mediated knockout of Yap1. Statistics were calculated by one-sided, paired Student's *t*-test. Data is presented as mean  $\pm$  SE ( $n = 3$ ), \*  $<0.05$ . (B) Immunoblot analysis of FoxM1 expression in hr-EF<sup>Prx1</sup> MSCLC#2 upon treatment with increasing concentrations of the Tead palmitoylation pocket inhibitor K-975 for 24 hr.

Figure S9

A

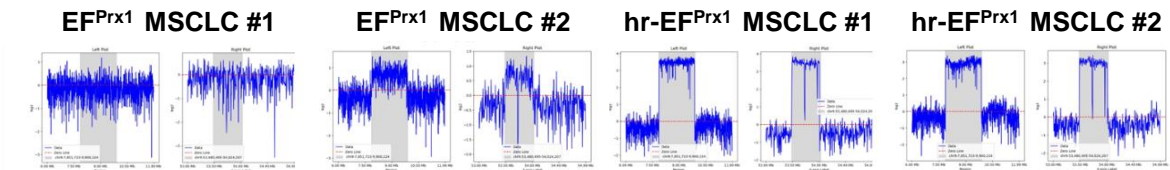

B

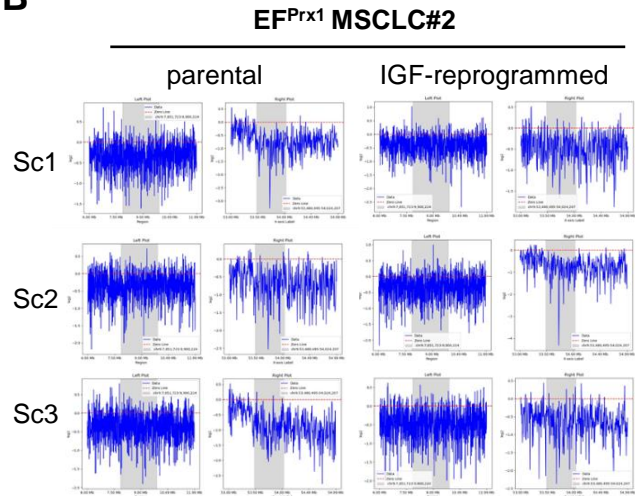

C

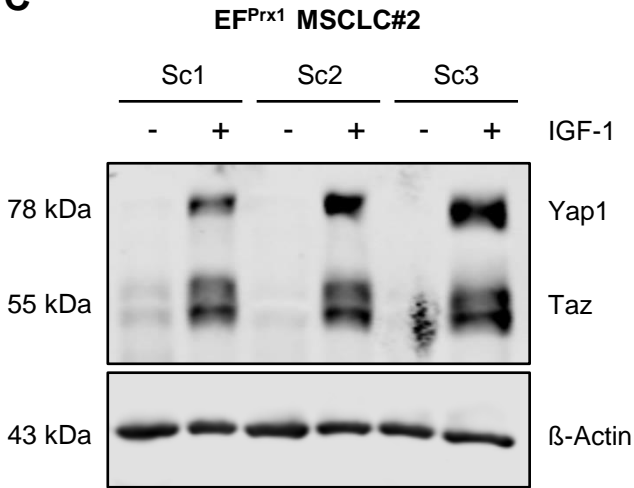

D

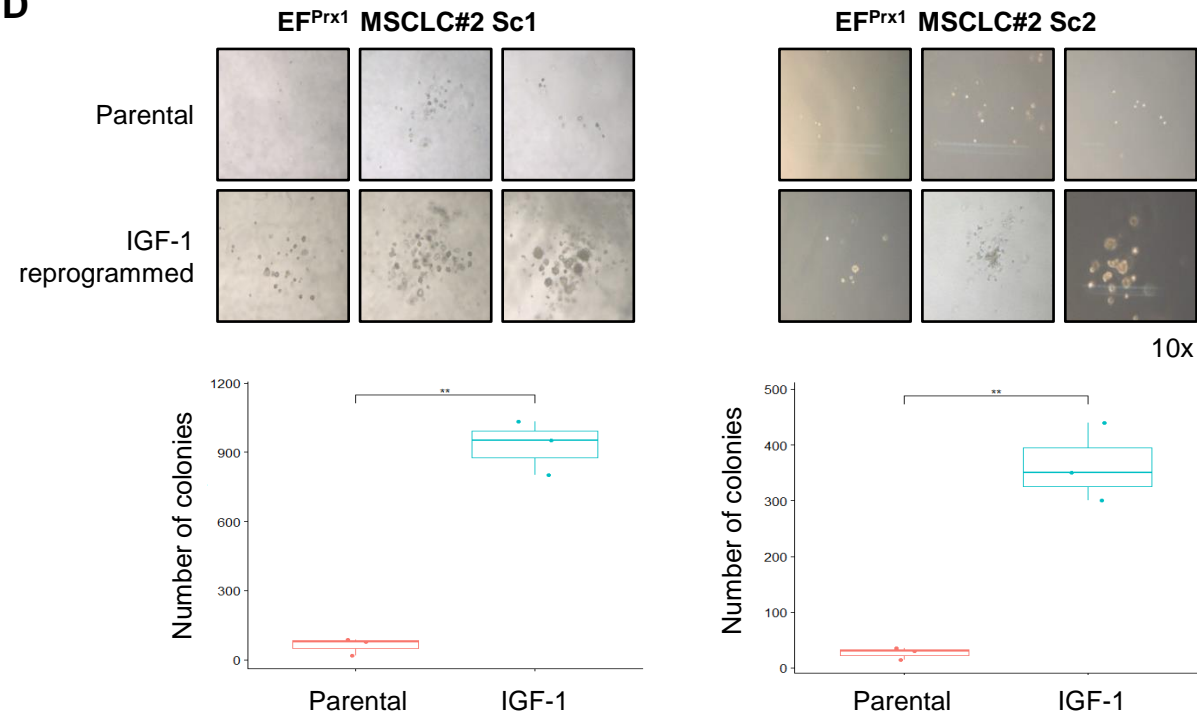



**Figure S9** Yap1 induction in IGF-1 reprogrammed cells is independent of but supported by sub-clonal copy number gains at chromosome 9q.

**(A)** LcWGS profiles of chromosome 9q regions chr9:7,851,723-9,900,224 (left) and chr9:53,480,495-54,024,207 (right) (grey shaded areas) for bulk parental and IGF-1 reprogrammed derivative EF<sup>Prx1</sup> MSCLC pools #1 and #2 identifying subtle copy number gains at the *Yap1* locus (less than two-fold) in the pool derived from EF<sup>Prx1</sup> founder mouse #2 but not #1 suggesting the presence of a *Yap1* amplified subclone in at least one of the parental cell lines, while derivative IGF-1 reprogrammed cell pools showed a two- to four-fold (hr-EF<sup>Prx1</sup> #2) and an approximately 8-fold (hr-EF<sup>Prx1</sup> #1) copy number increase at the *Yap1* locus, respectively. **(B)** To exclude IGF-1 mediated selection of a small *Yap1* amplified subclone in parental EF<sup>Prx1</sup> MSCLC as the origin of stably transformed *Yap1* overexpressing cells, bulk parental EF<sup>Prx1</sup> MSCLC #2 were subjected to minimal dilution to raise single-cell clones followed by IGF-1 reprogramming. None of three tested parental and IGF-1 reprogrammed single-cell clones (Sc1, Sc2, Sc3) showed chromosome 9 copy number gains. Log2-fold copy number change (y-axis) is presented at two scales for each condition (left and right plots). **(C)** Immuno-blot analysis of *Yap1*, *Taz*, and beta actin protein expression in untreated and IGF-1 reprogrammed single-cell clones Sc1-3 derived from parental EF<sup>Prx1</sup> MSCLC#2 identifying stable induction of *Yap1* and to a lesser extent *Taz* protein expression. **(D)** Soft-agar colony formation of parental and hr-EF<sup>Prx1</sup> single cell clones Sc1 and Sc2 showing a significant increase in soft agar colony formation of hr-EF<sup>Prx1</sup> single cell clones lacking *Yap1* amplification similar to the bulk population.

## Supplemental references

- [S1] Love, M.I., Huber, W., and Anders, S. (2014). Moderated estimation of fold change and dispersion for RNA-seq data with DESeq2. *Genome Biol* 15, 550. 10.1186/s13059-014-0550-8.
- [S2] Kinsey, M., Smith, R., and Lessnick, S.L. (2006). NR0B1 is required for the oncogenic phenotype mediated by EWS/FLI in Ewing's sarcoma. *Mol Cancer Res* 4, 851-859. 10.1158/1541-7786.MCR-06-0090.
- [S3] Riggi, N., Suva, M.L., Suva, D., Cironi, L., Provero, P., Tercier, S., Joseph, J.M., Stehle, J.C., Baumer, K., Kindler, V., and Stamenkovic, I. (2008). EWS-FLI-1 expression triggers a Ewing's sarcoma initiation program in primary human mesenchymal stem cells. *Cancer research* 68, 2176-2185. 10.1158/0008-5472.CAN-07-1761
- [S4] Korotkevich, G., Sukhov, V., Budin, N., Shpak, B., Artyomov, M.N., and Sergushichev, A. (2021). Fast gene set enrichment analysis. *bioRxiv*, 060012. 10.1101/060012.
- [S5] Federico, A., and Monti, S. (2020). hypeR: an R package for geneset enrichment workflows. *Bioinformatics* 36, 1307-1308. 10.1093/bioinformatics/btz700.
